1  
2 Amikacin potentiator activity of zinc complexed to a pyrithione derivative with enhanced  
3 solubility

4  
5 Jesus Magallon, Peter Vu, Craig Reeves, Stella Kwan, Kimberly Phan, Crista L. Oakley-  
6 Havens, Kenneth Rocha, Veronica Jimenez, María Soledad Ramirez, Marcelo E.  
7 Tolmasky\*

8  
9  
10 Center for Applied Biotechnology Studies, Department of Biological Science, California  
11 State University Fullerton, Fullerton, CA, USA

12  
13  
14 **Keywords:** aminoglycoside, antibiotic resistance, pyrithione, zinc, acetyltransferase  
15

16  
17  
18  
19 **Correspondence:**  
20 Marcelo E. Tolmasky  
21 Center for Applied Biotechnology Studies  
22 Department of Biological Science  
23 California State University Fullerton  
24 800 N State College Boulevard  
25 Fullerton, CA 92831-3599  
26 USA  
27 Phone 657-278-5263  
28 [mtolmasky@fullerton.edu](mailto:mtolmasky@fullerton.edu)  
29

30

31

32 Resistance to amikacin in Gram-negatives is usually mediated by the 6'-N-  
33 acetyltransferase type Ib [AAC(6')-Ib], which catalyzes the transfer of an acetyl group  
34 from acetyl CoA to the 6' position of the antibiotic molecule. A path to continue the  
35 effective use of amikacin against resistant infections is to combine it with inhibitors of  
36 the inactivating reaction. We have recently observed that addition of Zn<sup>2+</sup> to in-vitro  
37 enzymatic reactions, obliterates acetylation of the acceptor antibiotic. Furthermore,  
38 when added to amikacin-containing culture medium in complex to ionophores such as  
39 pyrithione (ZnPT), it prevents the growth of resistant strains. An undesired property of  
40 ZnPT is its poor water-solubility, a problem that currently affects a large percentage of  
41 newly designed drugs. Water-solubility helps drugs to dissolve in body fluids and be  
42 transported to the target location. We tested a pyrithione derivative described previously  
43 (Magda et al. Cancer Res. 2008, 68:5318-5325) that contains the amphoteric group  
44 di(ethyleneglycol)-methyl ether at position 5 (compound 5002), a modification that  
45 enhances the solubility. Compound 5002 in complex with zinc (Zn5002) was tested to  
46 assess growth inhibition of amikacin-resistant *Acinetobacter baumannii* and *Klebsiella*  
47 *pneumoniae* strains in the presence of the antibiotic. Zn5002 complexes in combination  
48 with amikacin at different concentrations completely inhibited growth of the tested  
49 strains. However, the concentrations needed to achieve growth inhibition were higher  
50 than those required to achieve the same results using ZnPT. Time-kill assays showed  
51 that the effect of the combination amikacin/Zn5002 was bactericidal. These results  
52 indicate that derivatives of pyrithione with enhanced water-solubility, a property that  
53 would make them drugs with better bioavailability and absorption, are a viable option for  
54 designing inhibitors of the resistance to amikacin mediated by AAC(6')-Ib, an enzyme  
55 commonly found in the clinics.

## 56 Introduction

57 Water-solubility helps drugs dissolve in body fluids and be transported to the target  
58 location <sup>1</sup>. Unfortunately, about half of the chemical compounds identified as potential  
59 new medicines are poorly soluble in water <sup>2,3</sup>. Currently, many efforts and techniques  
60 focus on enhancing the water-solubility of lead compounds, which illustrates this  
61 property's importance for pharmacological tools <sup>1-7</sup>.

62 Studies to isolate inhibitors of aminoglycoside-modifying enzymes, in particular the  
63 aminoglycoside 6'-N-acetyltransferase type Ib [AAC(6')-Ib], a widely distributed enzyme  
64 that specifies resistance to the semisynthetic amikacin <sup>8-10</sup>, showed that Zn<sup>2+</sup> complexed  
65 to pyrithione (ZnPT) (Fig. 1) counter the action of AAC(6')-Ib in bacterial cells in culture  
66 <sup>11,12</sup>. Consequently, combinations amikacin/ZnPT produced a substantial reduction in  
67 the minimal inhibitory concentration of amikacin of AAC(6')-Ib-containing *Acinetobacter*  
68 *baumannii*, *Escherichia coli*, *Enterobacter cloacae*, and *Klebsiella pneumoniae* isolates  
69 <sup>11-14</sup>. However, complexes formed between pyrithione and divalent metal cations, which  
70 occur through the oxygen and sulfur atoms, have very low solubility in aqueous  
71 solvents, impairing bioavailability <sup>15</sup>. To deal with this limitation, Magda et al. designed  
72 pyrithione derivatives with substitutions at position 5 to enhance their solubility in  
73 aqueous solvents <sup>7</sup>. Here, we show that a complex formed between a water-soluble  
74 pyrithione derivative, compound 5002, and Zn<sup>2+</sup> (Zn5002) (Fig. 1) exhibits amikacin  
75 resistance inhibitory properties similar, albeit not as robust, to those observed when  
76 testing ZnPT.

77

## 78 **Results**

79 The addition of  $Zn^{2+}$  to reaction mixtures containing AAC(6')-Ib and aminoglycosides  
80 known to be substrates for this enzyme exerts a strong inhibition effect of the antibiotic's  
81 acetylation<sup>12</sup>. However, inhibition of resistance in cells in culture requires very high  
82 concentrations of zinc salts in the culture medium. The concentrations of zinc ions  
83 required to reverse resistance can be drastically reduced supplementing the growth  
84 medium with the complex ZnPT<sup>11,12</sup>. An inconvenience to develop ZnPT as an adjuvant  
85 to aminoglycosides to treat resistant bacteria is its poor solubility in water. Previous  
86 work by Magda et al. showed that substituting the hydrogen at position 5 of pyrithione  
87 by some amphoteric chemical groups results in derivatives with higher water-solubility  
88 that can still diffuse across the membrane<sup>7</sup>. We synthesized compound 5002, in which  
89 the hydrogen at position 5 is replaced by di(ethyleneglycol)-methyl ether group (Fig. 1).  
90 This compound was complexed to  $Zn^{2+}$  (Zn5002) and tested as a potentiator to  
91 amikacin to overcome resistance in AAC(6')-Ib-carrying *A. baumannii*, and *K.*  
92 *pneumoniae* cells.

93 All four strains tested were cultured in the presence of amikacin, the ionophore-zinc  
94 complex, or a combination of both compounds at different concentrations. Fig. 2 shows  
95 the growth curves corresponding to the combinations that include the minimum possible  
96 concentration of each component to inhibit growth completely. The figure also shows  
97 that when none or only one of the components was used to supplement the Mueller-  
98 Hinton broth there was healthy bacterial growth. Although the concentrations required to  
99 inhibit growth vary from strain to strain, there was an appropriate combination in all  
100 cases such that the individual components did not impede growth. It can also be noted

101 that the ZnPT concentration necessary to overcome the resistance to amikacin is  
102 consistently lower than that of Zn5002.

103 The results obtained in the experiments described above indicate that the complex  
104 Zn5002, as we showed before for ZnPT, is responsible for the phenotypic conversion to  
105 amikacin susceptibility in bacterial pathogens harboring the resistance enzyme AAC(6')-  
106 Ib. However, these experiments did not inform about the bactericidal or bacteriostatic  
107 effect of the combination. Therefore, we carried out time-kill assays to confirm that the  
108 inhibition of growth observed in the presence of Zn5002 and the antibiotic is due to a  
109 bactericidal effect. For comparison, we carried out another series of assays using  
110 amikacin and ZnPT. Fig. 3 shows that the addition of amikacin and Zn5002 or ZnPT is  
111 followed by rapid loss of bacterial cell viability. Conversely, addition of amikacin or zinc-  
112 ionophore alone did not result in cell death. These assays showed that amikacin has a  
113 robust bactericidal activity on the AAC(6')-Ib-carrying *A. baumannii* A144, A155,  
114 A118(pJHCMW1), and *K. pneumoniae* JHCK1 strains when administered in  
115 combination with the complexes.

116

## 117 **Discussion**

118 Water-solubility is a desirable characteristic of drugs for enhanced bioavailability<sup>2,3</sup>.  
119 Various routes of administration, such as oral or parenteral, depend on the drug water  
120 solubility to be viable options<sup>5,16</sup>. Drugs that readily dissolve in the aqueous body fluids  
121 are more efficient in reaching the desired concentrations, being transported to, and  
122 reaching their target<sup>1</sup>. These characteristics make them therapeutically effective without  
123 the need to use high doses that could be the cause of secondary effects<sup>1</sup>. Conversely,  
124 low water-solubility is the cause of failure of numerous drug candidates<sup>1</sup>.

125 Amikacin is an aminoglycoside most commonly administered intravenously and  
126 intramuscularly, yet other routes are also utilized, such as intrathecal, intraventricular,  
127 topical, and inhaled<sup>8,17,18</sup>. In our quest to identify compounds that inhibit the AAC(6')-Ib  
128 amikacin-disabling action, we recently found that various cations effectively interfere  
129 with the enzymatic inactivation<sup>11,12,19-21</sup>. In the case of Zn<sup>2+</sup>, the concentrations needed  
130 to inhibit growth of amikacin-resistant cells in the presence of the antibiotic are  
131 significantly reduced if the cation is added to the growth media in complex with  
132 ionophores<sup>11-13,20-22</sup>. A very effective complex to reduce amikacin resistance levels in  
133 various bacteria is ZnPT, a compound already being researched and repurposed for  
134 cancer treatments and that has low toxicity when tested on mice<sup>23,24</sup>. However, a  
135 drawback is its poor solubility in aqueous media and low bioavailability<sup>7,25</sup>. Addition of  
136 an amphoteric group, di(ethyleneglycol)-methyl ether, to position 5 of pyrithione  
137 (compound 5002) enhances the chemical's solubility in water without increasing toxicity  
138 (Fig. 1)<sup>7</sup>. A comparison of the complexes Zn5002 and ZnPT showed that both  
139 compounds act as adjuvants to amikacin. The addition of Zn5002 plus amikacin to the

140 nutrient medium inhibits growth and has a bactericidal effect. The active concentrations  
141 of the components, amikacin and Zn-ionophore complex, varied from strain to strain.  
142 This characteristic can be due to *aac(6')-Ib* gene dosage or other mechanisms or  
143 properties that may help the resistance, such as efflux pumps or low permeability.  
144 Inspection of the results indicates that the active concentrations of Zn5002 were  
145 consistently higher than those of ZnPT, suggesting that a reduction in activity  
146 accompanied the gain in solubility in aqueous solutions. However, the fact that a highly  
147 water-soluble derivative of ZnPT conserved the activity indicates that further research  
148 will permit us to design other robust adjuvants with high water-solubility. Those  
149 compounds will be strong potentiators to aminoglycosides to overcome resistance.

150

151

## 152 **Methods**

### 153 **Bacterial strains**

154 The bacterial strains used in this study were *A. baumannii* A155<sup>26</sup>, A144<sup>27</sup>, and  
155 A118(pJHCMW1)<sup>28</sup>, and *K. pneumoniae* JHCK1<sup>29</sup>. *A. baumannii* A155 and A144 are  
156 multidrug-resistant and include *aac(6')-Ib* in their genomes<sup>26,27</sup>. *A. baumannii* A118 is a  
157 blood isolate characterized for being susceptible to most antibiotics<sup>28</sup>. This strain was  
158 transformed with pJHCMW1, a plasmid that carries *aac(6')-Ib*<sup>30</sup>. *K. pneumoniae* JHCK1  
159 is a multidrug-resistant isolate from cerebrospinal fluid of a neonate with meningitis<sup>31</sup>.

### 160 **General procedures**

161 Routine bacterial cultures were carried out in L broth (Lennox, 1% tryptone, 0.5%  
162 yeast extract, 0.5% NaCl), with the addition of 2% agar for plates. was tested  
163 inoculating 100- $\mu$ l Mueller-Hinton broth in microtiter plates with the specified additions  
164 using the BioTek Synergy 5 microplate reader

165 Inhibition of growth was determined by inoculating Mueller-Hinton broth (100- $\mu$ l)  
166 containing the indicated additions. The microtiter plates were incubated with shaking at  
167 37°C in a BioTek Synergy 5 microplate reader as previously described<sup>20</sup>. The cultures'  
168 optical density values at 600 nm (OD<sub>600</sub>) were determined at regular intervals. ZnPT  
169 was purchased from MilliporeSigma, and Zn5002 was synthesized and purified to  
170 97.87% by BioSynthesis Inc. All cultures to determine the action of zinc-ionophore  
171 complexes inhibition of resistance to amikacin or bactericidal effect included 0.5%  
172 dimethylsulfoxide (MilliporeSigma). Time-kill assays were performed as before<sup>20</sup>.  
173 Briefly, cells were cultured in Mueller-Hinton broth until they reached 10<sup>6</sup> CFU/ml. At this



174 time, the compounds to be tested were added, and the cultures were continued at 37°C  
175 with shaking. The number of cells was determined by taking aliquots after 0, 4, 8, 20,  
176 and 32 h.  
177

178 **Data availability**

179 Bacterial strains used in this work are available upon request.

180

181

## 182 **References**

- 183 1 Abuzar, S. M. *et al.* Enhancing the solubility and bioavailability of poorly water-  
184 soluble drugs using supercritical antisolvent (SAS) process. *Int J Pharm* **538**, 1-  
185 13, doi:10.1016/j.ijpharm.2017.12.041 (2018).
- 186 2 Gupta, S., Kesarla, R. & Omri, A. Formulation strategies to improve the  
187 bioavailability of poorly absorbed drugs with special emphasis on self-emulsifying  
188 systems. *ISRN Pharm* **2013**, 848043, doi:10.1155/2013/848043 (2013).
- 189 3 Patel, V. R. & Agrawal, Y. K. Nanosuspension: an approach to enhance solubility  
190 of drugs. *J Adv Pharm Technol Res* **2**, 81-87, doi:10.4103/2231-4040.82950  
191 (2011).
- 192 4 Garg, A. K. *et al.* Solubility enhancement, formulation development and  
193 antifungal activity of luliconazole niosomal gel-based system. *J Biomater Sci*  
194 *Polym Ed*, 1-15, doi:10.1080/09205063.2021.1892471 (2021).
- 195 5 Savjani, K. T., Gajjar, A. K. & Savjani, J. K. Drug solubility: importance and  
196 enhancement techniques. *ISRN Pharm* **2012**, 195727, doi:10.5402/2012/195727  
197 (2012).
- 198 6 Wen, Y. *et al.* Azithromycin-loaded linolenic acid-modified methoxy poly(ethylene  
199 glycol) micelles for bacterial infection treatment. *Drug Deliv Transl Res*,  
200 doi:10.1007/s13346-021-00953-2 (2021).
- 201 7 Magda, D. *et al.* Synthesis and anticancer properties of water-soluble zinc  
202 ionophores. *Cancer Res* **68**, 5318-5325, doi:10.1158/0008-5472.CAN-08-0601  
203 (2008).

- 204 8 Ramirez, M. S. & Tolmasky, M. E. Amikacin: uses, resistance, and prospects for  
205 inhibition. *Molecules* **22**, doi:10.3390/molecules22122267 (2017).
- 206 9 Ramirez, M. S. & Tolmasky, M. E. Aminoglycoside modifying enzymes. *Drug*  
207 *Resist Updat* **13**, 151-171, doi:10.1016/j.drug.2010.08.003 (2010).
- 208 10 Ramirez, M. S., Nikolaidis, N. & Tolmasky, M. E. Rise and dissemination of  
209 aminoglycoside resistance: the *aac(6')-Ib* paradigm. *Front Microbiol* **4**, 121,  
210 doi:10.3389/fmicb.2013.00121 (2013).
- 211 11 Chiem, K. *et al.* Inhibition of aminoglycoside 6'-N-acetyltransferase type Ib-  
212 mediated amikacin resistance in *Klebsiella pneumoniae* by zinc and copper  
213 pyrithione. *Antimicrob Agents Chemother* **59**, 5851-5853,  
214 doi:10.1128/AAC.01106-15 (2015).
- 215 12 Lin, D. L. *et al.* Inhibition of aminoglycoside 6'-N-acetyltransferase type Ib by zinc:  
216 reversal of amikacin resistance in *Acinetobacter baumannii* and *Escherichia coli*  
217 by a zinc ionophore. *Antimicrob Agents Chemother* **58**, 4238-4241,  
218 doi:10.1128/AAC.00129-14 (2014).
- 219 13 Li, Y., Green, K. D., Johnson, B. R. & Garneau-Tsodikova, S. Inhibition of  
220 aminoglycoside acetyltransferase resistance enzymes by metal salts. *Antimicrob*  
221 *Agents Chemother* **59**, 4148-4156, doi:10.1128/AAC.00885-15 (2015).
- 222 14 Cuajungco, M. P., Ramirez, M. S. & Tolmasky, M. E. Zinc: multidimensional  
223 effects on living organisms. *Biomedicines* **9**, doi:10.3390/biomedicines9020208  
224 (2021).

- 225 15 Borg-Neczak, K. & Tjalve, H. Effect of sodium pyridinethione on the uptake and  
226 distribution of nickel in rats, ferrets and guinea-pigs. *Arch Toxicol* **68**, 450-458,  
227 doi:10.1007/s002040050096 (1994).
- 228 16 Di, L. & Edward, K. In vivo environments affect drug exposure in *Drug-like*  
229 *properties: concepts, structure design, and methods* 15-28 (Elsevier, 2008).
- 230 17 Soleimani, M. *et al.* Current diagnostic tools and management modalities of  
231 *Nocardia keratitis*. *J Ophthalmic Inflamm Infect* **10**, 36, doi:10.1186/s12348-020-  
232 00228-w (2020).
- 233 18 Torres, A., Motos, A., Battaglini, D. & Li Bassi, G. Inhaled amikacin for severe  
234 Gram-negative pulmonary infections in the intensive care unit: current status and  
235 future prospects. *Crit Care* **22**, 343, doi:10.1186/s13054-018-1958-4 (2018).
- 236 19 Reeves, C. M. *et al.* Aminoglycoside 6'-*N*-acetyltransferase type Ib [AAC(6')-Ib]-  
237 mediated aminoglycoside resistance: phenotypic conversion to susceptibility by  
238 silver ions. *Antibiotics* **10**, doi:10.3390/antibiotics10010029 (2020).
- 239 20 Magallon, J. *et al.* Restoration of susceptibility to amikacin by 8-hydroxyquinoline  
240 analogs complexed to zinc. *PLoS One* **14**, e0217602,  
241 doi:10.1371/journal.pone.0217602 (2019).
- 242 21 Chiem, K., Hue, F., Magallon, J. & Tolmasky, M. E. Inhibition of aminoglycoside  
243 6'-*N*-acetyltransferase type Ib-mediated amikacin resistance by zinc complexed  
244 with clioquinol, an ionophore active against tumors and neurodegenerative  
245 diseases. *Int J Antimicrob Agents* **51**, 271-273,  
246 doi:10.1016/j.ijantimicag.2017.08.002 (2018).

- 247 22 Ahmed, S. *et al.* Retention of antibiotic activity against resistant bacteria  
248 harbouring aminoglycoside-*N*-acetyltransferase enzyme by adjuvants: a  
249 combination of in-silico and in-vitro study. *Sci Rep* **10**, 19381,  
250 doi:10.1038/s41598-020-76355-0 (2020).
- 251 23 Srivastava, G. *et al.* Anticancer activity of pyridithione zinc in oral cancer cells  
252 identified in small molecule screens and xenograft model: Implications for oral  
253 cancer therapy. *Mol Oncol* **9**, 1720-1735, doi:10.1016/j.molonc.2015.05.005  
254 (2015).
- 255 24 Zhao, C. *et al.* Repurposing an antidandruff agent to treating cancer: zinc  
256 pyridithione inhibits tumor growth via targeting proteasome-associated  
257 deubiquitinases. *Oncotarget* **8**, 13942-13956, doi:10.18632/oncotarget.14572  
258 (2017).
- 259 25 Jasim, S. & Tjalve, H. Effects of sodium pyridinethione on the uptake and  
260 distribution of nickel, cadmium and zinc in pregnant and non-pregnant mice.  
261 *Toxicology* **38**, 327-350, doi:10.1016/0300-483x(86)90148-4 (1986).
- 262 26 Arivett, B. A. *et al.* Draft genome of the multidrug-resistant *Acinetobacter*  
263 *baumannii* strain A155 clinical isolate. *Genome Announc* **3**, e00212-15,  
264 doi:10.1128/genomeA.00212-15 (2015).
- 265 27 Vilacoba, E. *et al.* Draft genome sequence of an international clonal lineage 1  
266 *Acinetobacter baumannii* strain from Argentina. *Genome Announc* **2**, e01190-14,  
267 doi:10.1128/genomeA.01190-14 (2014).

- 268 28 Ramirez, M. S. *et al.* Naturally competent *Acinetobacter baumannii* clinical isolate  
269 as a convenient model for genetic studies. *J Clin Microbiol* **48**, 1488-1490,  
270 doi:10.1128/JCM.01264-09 (2010).
- 271 29 Xie, G. *et al.* Genome sequences of two *Klebsiella pneumoniae* Isolates from  
272 different geographical regions, Argentina (strain JHCK1) and the United States  
273 (strain VA360). *Genome Announc* **1**, e00168-13, doi:10.1128/genomeA.00168-  
274 13 (2013).
- 275 30 Sarno, R., McGillivray, G., Sherratt, D. J., Actis, L. A. & Tolmasky, M. E.  
276 Complete nucleotide sequence of *Klebsiella pneumoniae* multiresistance plasmid  
277 pJHCMW1. *Antimicrob Agents Chemother* **46**, 3422-3427,  
278 doi:10.1128/AAC.46.11.3422-3427.2002 (2002).
- 279 31 Woloj, M., Tolmasky, M. E., Roberts, M. C. & Crosa, J. H. Plasmid-encoded  
280 amikacin resistance in multiresistant strains of *Klebsiella pneumoniae* isolated  
281 from neonates with meningitis. *Antimicrob Agents Chemother* **29**, 315-319,  
282 doi:10.1128/AAC.29.2.315 (1986).
- 283  
284  
285

286 **ACKNOWLEDGEMENTS**

287 This work was supported by Public Health Service grants 2R15AI047115 (M.E.T.)  
288 from the National Institute of Allergy and Infectious Diseases, National Institutes of  
289 Health, SC3GM125556 (M.S.R.) from the National Institute of General Medical  
290 Sciences, National Institutes of Health, and California State University Fullerton.

291

292 **COMPETING INTERESTS**

293 The author(s) declare no competing interests.

294

295 **AUTHOR CONTRIBUTIONS**

296 Conceptualization, M.E.T.; formal analysis, J.M., M.S.R., and M.E.T.; funding  
297 acquisition, M.S.R. and M.E.T.; methodology, J.M., P.V., C.R., S.K., K.P., C.L. O.-H., K.  
298 R., V.J., M.S.R., and M.E.T.; resources, M.S.R., and M.E.T.; writing—original draft  
299 preparation, M.E.T.; writing—review and editing, J.M., M.E.T., and M.S.R. All authors  
300 have read and agreed to the published version of the manuscript.

301

302

303



304 **Legends to Figures**

305

306 **Figure 1. Zn5002 and ZnPT complexes chemical structures.** Chemical structures of  
307 ZnPT (upper) and Zn5002 (lower).

308

309 **Figure 2. Effect of Zn5002 and ZnPT complexes on resistance to amikacin.**

310 *A. baumannii* A155, A144, A118(pJHCMW1), *K. pneumoniae* JHCK1, or *E. coli*

311 TOP10(pNW1) were cultured in 100  $\mu$ l Mueller-Hinton broth in microtiter plates at 37°C

312 with the additions indicated to the right of each panel, and the OD<sub>600</sub> was periodically

313 measured. All cultures contained 0.5 % DMSO. AMK, amikacin.

314

315 **Figure 3. Time-kill assay curves for amikacin in the presence of Zn5002 and ZnPT.**

316 *A. baumannii* A155, A144, A118(pJHCMW1), *K. pneumoniae* JHCK1, or *E. coli*

317 TOP10(pNW1) were cultured in 100  $\mu$ l Mueller-Hinton containing 0.5% DMSO until they

318 reach 10<sup>6</sup> CFU/ml. At this moment the cultures were supplemented with the additions

319 indicated to the right of each panel, the cultures were continued at 37°C with shaking

320 and samples were removed periodically to determine CFU/ml. AMK, amikacin.

321

322

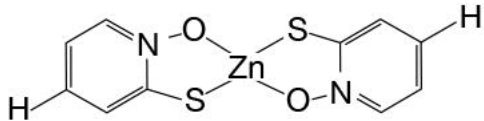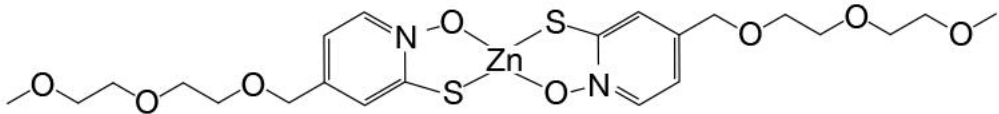

*Acinetobacter baumannii* A144

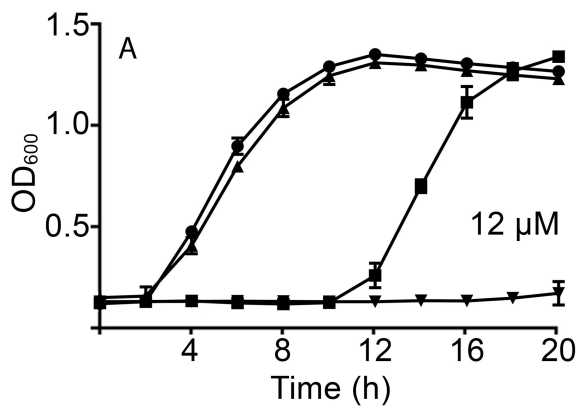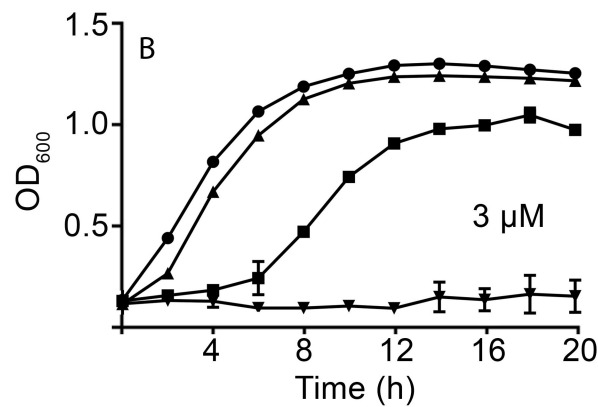

- None
- 16  $\mu$ g/ml AMK
- ▲ Zn5002 (A) or ZnPT (B)
- ▼ 16  $\mu$ g/ml AMK + Zn5002 (A) or ZnPT (B)

*Acinetobacter baumannii* A155

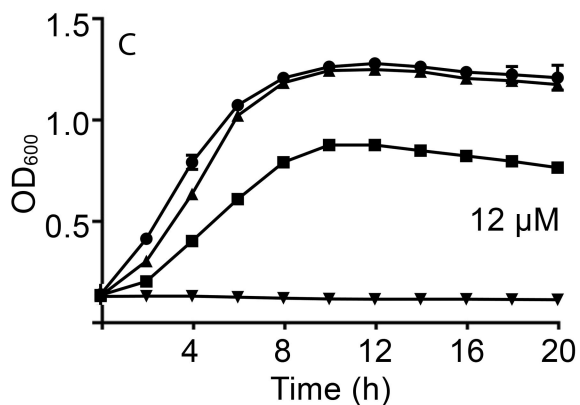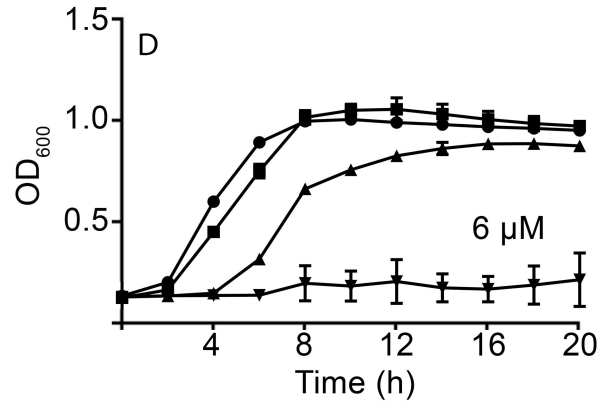

- None
- 16 (C) or 8 (D)  $\mu$ g/ml AMK
- ▲ Zn5002 (C) or ZnPT (D)
- ▼ 16 (C) or 8 (D)  $\mu$ g/ml AMK + Zn5002 (C) or ZnPT (D)

*Acinetobacter baumannii* A118(pJHCMW1)

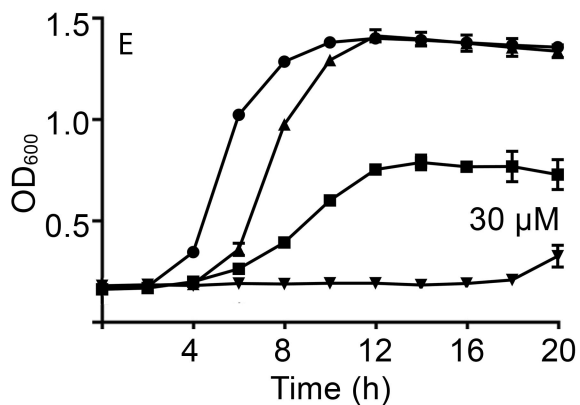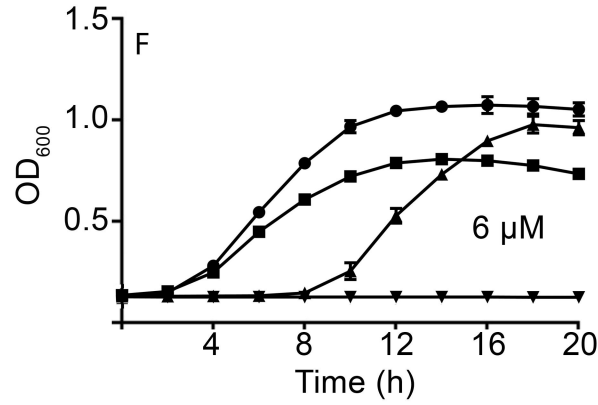

- None
- 8  $\mu$ g/ml AMK
- ▲ Zn5002 (E) or ZnPT (F)
- ▼ 8  $\mu$ g/ml AMK + Zn5002 (E) or ZnPT (F)

*Klebsiella pneumoniae* JHCK1

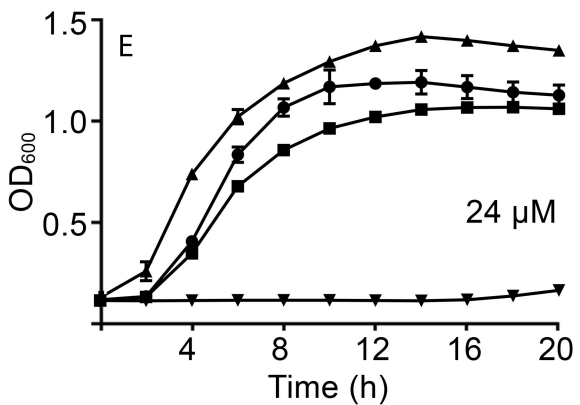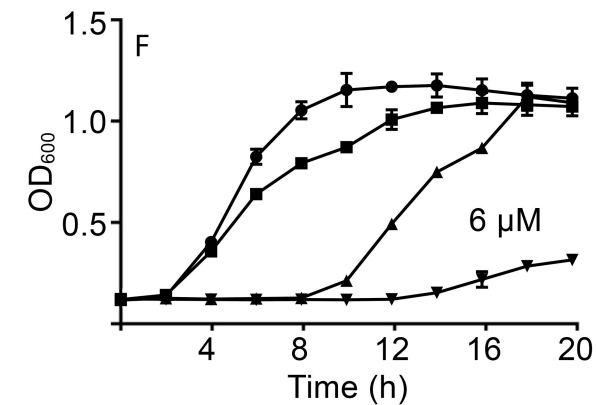

- None
- 24 (E) or 16 (F)  $\mu$ g/ml AMK
- ▲ Zn5002 (E) or ZnPT (F)
- ▼ 24 (E) or 16 (F)  $\mu$ g/ml AMK + Zn5002 (E) or ZnPT (F)

*Acinetobacter baumannii* A144

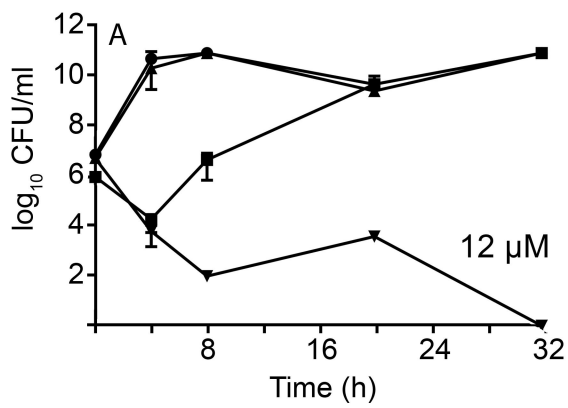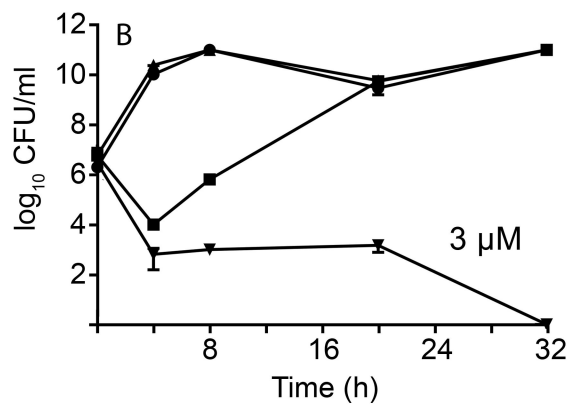

- None
- 16 μg/ml AMK
- ▲ Zn5002 (A) or ZnPT (B)
- ▼ 16 μg/ml AMK + Zn5002 (A) or ZnPT (B)

*Acinetobacter baumannii* A155

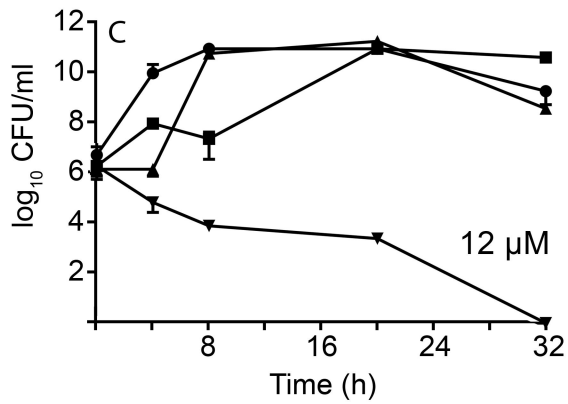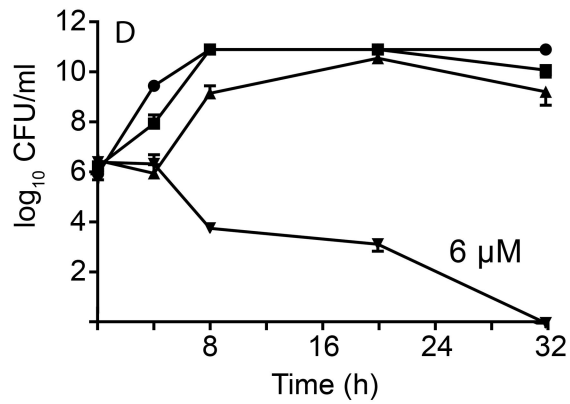

- None
- 16 (C) or 8 (D) μg/ml AMK
- ▲ Zn5002 (C) or ZnPT (D)
- ▼ 16 (C) or 8 (D) μg/ml AMK + Zn5002 (C) or ZnPT (D)

*Acinetobacter baumannii* A118(pJHCMW1)

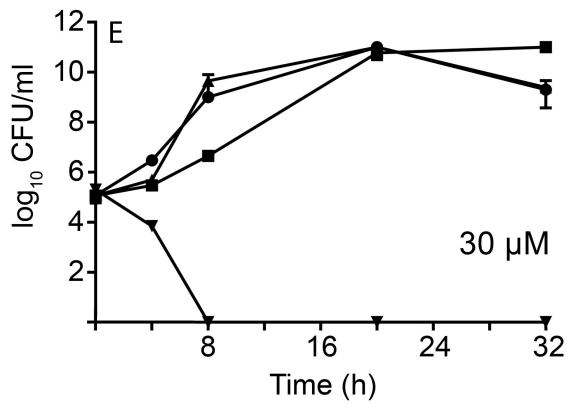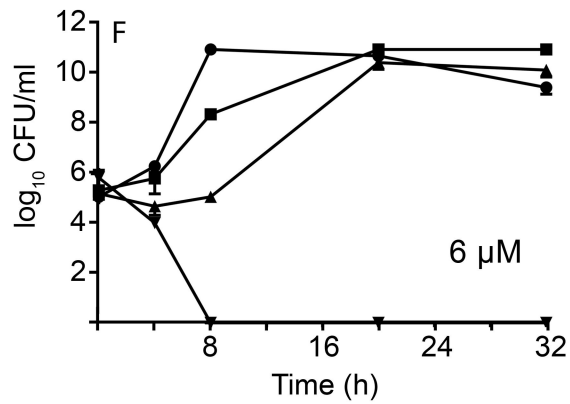

- None
- 8 μg/ml AMK
- ▲ Zn5002 (C) or ZnPT (D)
- ▼ 8 μg/ml AMK + Zn5002 (C) or ZnPT (D)

*Klebsiella pneumoniae* JHCK1

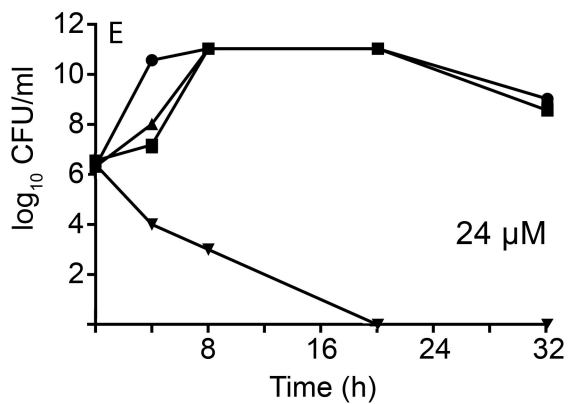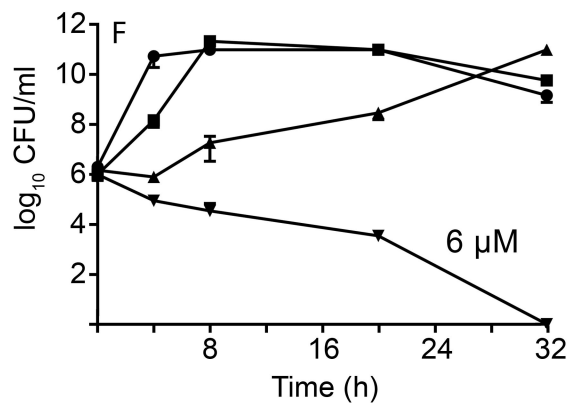

- None
- 24 (E) or 16 (F) μg/ml AMK
- ▲ Zn5002 (E) or ZnPT (F)
- ▼ 24 (E) or 16 (F) μg/ml AMK + Zn5002 (E) or ZnPT (F)
